# Supplementary material
Source: Research Square preprint supplement (doi:10.21203/rs.3.rs-9458485/v1)
Supplement: Supplementary file 1 [file 0a28da343342c8b946f67cbc.pdf]

## Supplementary Materials

**Title: Timescales of call variability in a South American treefrog**

**Authors:** Mariana Rodriguez-Santiago<sup>1</sup>, Paula Pouso<sup>2</sup>, Kim Hoke<sup>1</sup>, and Erik Zornik<sup>3</sup>

**Affiliations:**

<sup>1</sup>Department of Biology, Colorado State University, Fort Collins, CO

<sup>2</sup>Lab. Bases Neurales de la Comunicación Acústica, Depto. Histología y Embriología, Facultad de Medicina, Universidad de la República, Montevideo, Uruguay

<sup>3</sup>Biology Department, Reed College, Portland, OR

**Corresponding author email:** [marirod@colostate.edu](mailto:marirod@colostate.edu)

### Note feature definitions

**Duration:** signal length, in seconds

**INI:** inter-note interval, duration of time between offset of signal to onset of next signal, in seconds

**INO:** inter-note onset, duration of time between onset of signal to onset of next signal, in seconds

**Mean dom:** average of the dominant frequency measured through the signal, in kHz

**Max dom:** maximum of the dominant frequency measured through the signal, in kHz

**Mean peakF:** mean peak frequency, frequency with the highest energy from the mean frequency spectrum

**Df range:** dominant frequency range measured through the signal, in kHz

**Modindx:** modulation index, calculated as the cumulative absolute difference between adjacent measurements of dominant frequencies divided by the dominant frequency range. 1 means that the signal is not frequency modulated

**Sfm:** spectral flatness, pure tone ~ 0, loud ~1

**Skew:** skewness, asymmetry of the amplitude distribution

**Entropy:** product of the spectral and temporal entropy

**Time median:** average time, the time at which the signal is divided into two time intervals of equal energy, in seconds

**Time IQR:** interquartile time range, in seconds

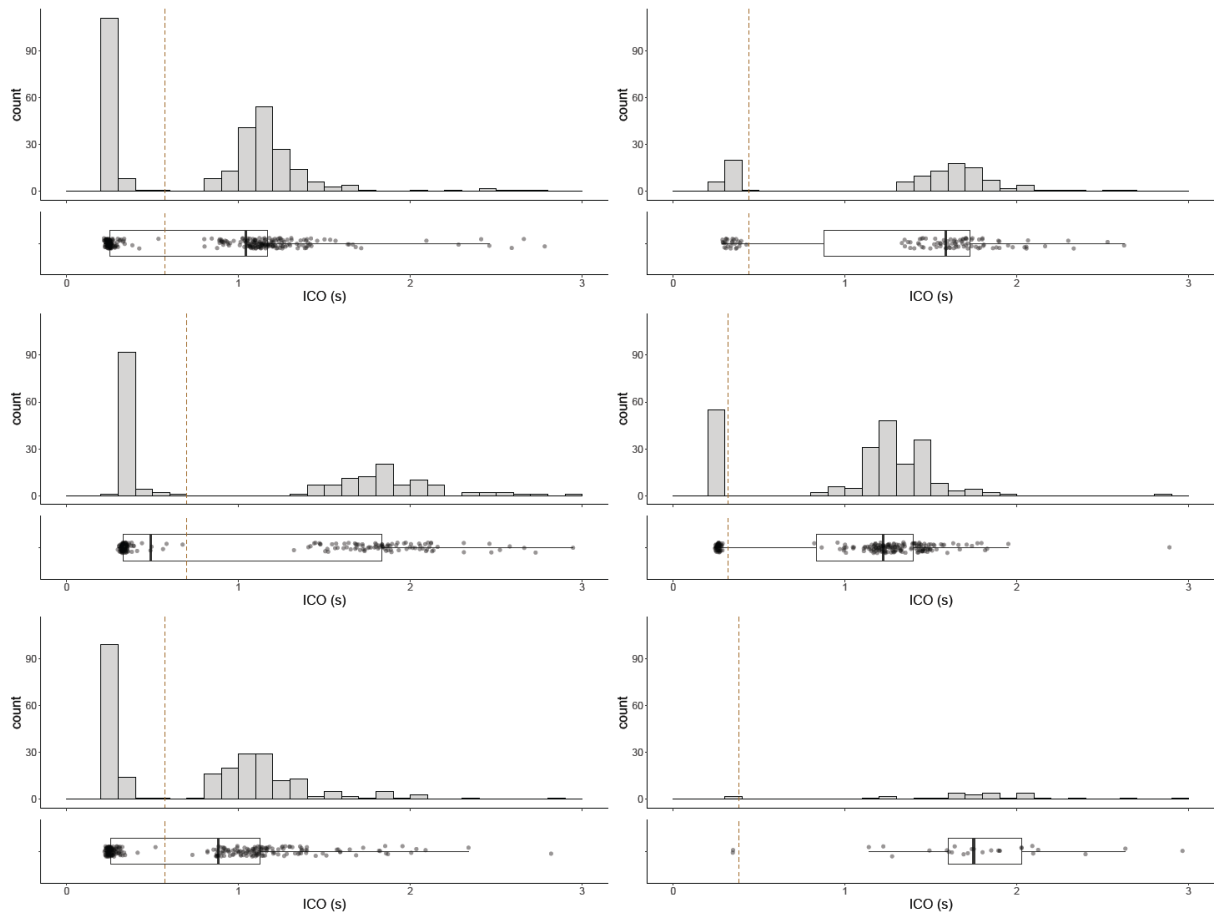

**Supp. Fig. 1** Examples of within-male inter-call onset (ICO) distributions. Vertical lines denote cut-offs for left-most peak distributions per male. Exact ICO cutoffs vary by individual males, all males had two unique ICO distributions with varying ranges.

| <i>Model: call dur ~ series length * seq + (1 frogID)</i> |                |          |            |                    |
|-----------------------------------------------------------|----------------|----------|------------|--------------------|
| Response variable                                         | Fixed Effect   | estimate | std. error | p-val (LRT)        |
| <b>duration</b>                                           | Intercept      | 0.113    | 0.004      | -                  |
|                                                           | Series4        | -0.0003  | 0.003      | 0.918              |
|                                                           | Series5        | -0.016   | 0.004      | < <b>0.001</b> *** |
|                                                           | SeqMid         | -0.016   | 0.001      | < <b>0.001</b> *** |
|                                                           | Series4*SeqMid | -0.001   | 0.004      | 0.745              |
|                                                           | Series5*SeqMid | 0.012    | 0.005      | <b>0.02</b> *      |
| Marginal R <sup>2</sup> :                                 | 0.2            |          |            |                    |
| Conditional R <sup>2</sup> :                              | 0.76           |          |            |                    |
| <i>Model: ICI ~ series length * seq + (1 frogID)</i>      |                |          |            |                    |
| Response variable                                         | Fixed Effect   | estimate | std. error | p-val (LRT)        |
| <b>ICI</b>                                                | Intercept      | 0.18     | 0.016      | -                  |
|                                                           | Series4        | 0.073    | 0.021      | < <b>0.001</b> *** |
|                                                           | Series5        | 0.022    | 0.031      | 0.471              |
|                                                           | SeqMid         | 0.042    | 0.009      | < <b>0.001</b> *** |
|                                                           | Series4*SeqMid | 0.001    | 0.025      | 0.963              |
|                                                           | Series5*SeqMid | 0.011    | 0.035      | 0.748              |
| Marginal R <sup>2</sup> :                                 | 0.16           |          |            |                    |
| Conditional R <sup>2</sup> :                              | 0.48           |          |            |                    |
| <i>Model: ICO ~ series length * seq + (1 frogID)</i>      |                |          |            |                    |
| Response variable                                         | Fixed Effect   | estimate | std. error | p-val (LRT)        |
| <b>ICO</b>                                                | Intercept      | 0.293    | 0.018      | -                  |
|                                                           | Series4        | 0.073    | 0.021      | < <b>0.001</b> *** |
|                                                           | Series5        | 0.006    | 0.032      | 0.842              |
|                                                           | SeqMid         | 0.026    | 0.009      | <b>0.001</b> **    |
|                                                           | Series4*SeqMid | -0.00001 | 0.003      | 0.1                |
|                                                           | Series5*SeqMid | 0.023    | 0.036      | 0.522              |
| Marginal R <sup>2</sup> :                                 | 0.098          |          |            |                    |
| Conditional R <sup>2</sup> :                              | 0.508          |          |            |                    |

**Supp. Table 1** Results of linear mixed model to examine how call features vary depending on series length and within-series sequence order. Coefficients from three linear mixed models are presented in the table organized by response variable (call duration, ICI, ICO). For all models, series type (containing three, four, five calls) and sequence order (first and mid) are included as fixed effects and individual frog (frogID, n=18) as a random effect. The reference levels were series length “three” and sequence “first”.

| <i>Model: note dur ~ series length * seq + (1 frogID)</i> |                |          |            |                    |
|-----------------------------------------------------------|----------------|----------|------------|--------------------|
| Response variable                                         | Fixed Effect   | estimate | std. error | p-val (LRT)        |
| <b>Note 1 duration</b>                                    | Intercept      | 0.016    | 0.0004     | -                  |
|                                                           | Series4        | 0.0004   | 0.0005     | 0.353              |
|                                                           | Series5        | -0.0005  | 0.0008     | 0.535              |
|                                                           | SeqMid         | -0.002   | 0.0002     | < <b>0.001</b> *** |
|                                                           | Series4*SeqMid | -0.0002  | 0.0006     | 0.788              |
|                                                           | Series5*SeqMid | 0.0007   | 0.0009     | 0.428              |
| Marginal R <sup>2</sup> :                                 | 0.374          |          |            |                    |
| Conditional R <sup>2</sup> :                              | -              |          |            |                    |
| Response variable                                         | Fixed Effect   | estimate | std. error | p-val (LRT)        |
| <b>Note 2 duration</b>                                    | Intercept      | 0.04     | 0.002      | -                  |
|                                                           | Series4        | 0.0009   | 0.001      | 0.482              |
|                                                           | Series5        | 0.0006   | 0.002      | 0.754              |
|                                                           | SeqMid         | -0.008   | 0.0001     | < <b>0.001</b> *** |
|                                                           | Series4*SeqMid | -0.001   | 0.002      | 0.454              |
|                                                           | Series5*SeqMid | -0.003   | 0.002      | 0.224              |
| Marginal R <sup>2</sup> :                                 | 0.254          |          |            |                    |
| Conditional R <sup>2</sup> :                              | 0.775          |          |            |                    |
| <i>Model: INI ~ series length * seq + (1 frogID)</i>      |                |          |            |                    |
| Response variable                                         | Fixed Effect   | estimate | std. error | p-val (LRT)        |
| <b>INI</b>                                                | Intercept      | 0.058    | 0.003      | -                  |
|                                                           | Series4        | -0.002   | 0.001      | 0.253              |
|                                                           | Series5        | -0.003   | 0.002      | 0.216              |
|                                                           | SeqMid         | -0.006   | 0.001      | < <b>0.001</b> *** |
|                                                           | Series4*SeqMid | 0.003    | 0.002      | 0.123              |
|                                                           | Series5*SeqMid | 0.006    | 0.003      | <b>0.04</b> *      |
| Marginal R <sup>2</sup> :                                 | 0.061          |          |            |                    |
| Conditional R <sup>2</sup> :                              | 0.8            |          |            |                    |
| <i>Model: INO ~ series length * seq + (1 frogID)</i>      |                |          |            |                    |
| Response variable                                         | Fixed Effect   | estimate | std. error | p-val (LRT)        |
| <b>INO</b>                                                | Intercept      | 0.073    | 0.003      | -                  |
|                                                           | Series4        | -0.001   | 0.001      | 0.44               |
|                                                           | Series5        | -0.003   | 0.002      | 0.154              |
|                                                           | SeqMid         | -0.008   | 0.001      | < <b>0.001</b> *** |
|                                                           | Series4*SeqMid | 0.003    | 0.002      | 0.151              |
|                                                           | Series5*SeqMid | 0.006    | 0.003      | 0.02               |
| Marginal R <sup>2</sup> :                                 | 0.118          |          |            |                    |
| Conditional R <sup>2</sup> :                              | 0.853          |          |            |                    |
| <i>Model: note DF ~ series length * seq + (1 frogID)</i>  |                |          |            |                    |
| Response variable                                         | Fixed Effect   | estimate | std. error | p-val (LRT)        |
| <b>Note 1 DF</b>                                          | Intercept      | 2.512    | 0.047      | -                  |
|                                                           | Series4        | 0.005    | 0.048      | 0.915              |
|                                                           | Series5        | -0.039   | 0.081      | 0.628              |
|                                                           | SeqMid         | 0.022    | 0.021      | 0.279              |
|                                                           | Series4*SeqMid | -0.003   | 0.062      | 0.955              |
|                                                           | Series5*SeqMid | 0.003    | 0.094      | 0.974              |
| Response variable                                         | Fixed Effect   | estimate | std. error | p-val (LRT)        |
| <b>Note 2 DF</b>                                          | Intercept      | 2.574    | 0.056      | -                  |
|                                                           | Series4        | -0.091   | 0.085      | 0.281              |
|                                                           | Series5        | 0.03     | 0.141      | 0.833              |
|                                                           | SeqMid         | 0.042    | 0.037      | 0.249              |
|                                                           | Series4*SeqMid | -0.136   | 0.109      | 0.213              |
|                                                           | Series5*SeqMid | -0.063   | 0.165      | 0.704              |

**Supp. Table 2** Results of linear mixed model to examine how note features vary depending on series length and within-series position. Coefficients from six linear mixed models are presented in the table organized by response variable (duration, INI, INO, and DF). For all models, series type (containing three, four, five calls) and sequence order (first, mid) are included as fixed effects and individual frog (frogID, n=18) as a random effect. The reference levels were series length “three” and sequence “first”.

**Variation in Temporal Features Across Timescales**

|               |        | feature                                        | N  | mean<br>(s) | sd<br>(s)   | mean CV <sub>w</sub><br>(%) | CV <sub>b</sub><br>(%) | CV <sub>b</sub> / CV <sub>w</sub> |
|---------------|--------|------------------------------------------------|----|-------------|-------------|-----------------------------|------------------------|-----------------------------------|
| within bouts  | series | duration                                       | 18 | 0.25        | 0.08        | 68.80                       | 33.22                  | 0.48                              |
|               |        | interval                                       | 18 | 1.65        | 0.24        | 42.70                       | 14.69                  | 0.34                              |
|               |        | ISO                                            | 18 | 1.90        | 0.25        | 36.60                       | 13.39                  | 0.37                              |
|               | calls  | duration                                       | 18 | 0.11        | 0.01        | 11.12                       | 11.81                  | 1.06                              |
|               |        | interval                                       | 18 | 1.23        | 0.31        | 73.89                       | 25.04                  | 0.34                              |
|               |        | ICO                                            | 18 | 1.34        | 0.32        | 67.25                       | 23.69                  | 0.35                              |
|               | notes  | NI duration                                    | 18 | 0.01        | 0.00        | 11.59                       | 9.83                   | 0.85                              |
|               |        | N2 duration                                    | 18 | 0.04        | 0.01        | 13.91                       | 15.39                  | 1.11                              |
|               |        | interval                                       | 18 | 0.06        | 0.01        | 9.47                        | 16.87                  | 1.78                              |
|               |        | INO                                            | 18 | 0.07        | 0.01        | 8.04                        | 12.75                  | 1.59                              |
|               |        | N1 DF (kHz)                                    | 18 | 2.56        | 0.15        | 4.03                        | 5.68                   | 1.41                              |
|               |        | N2 DF (kHz)                                    | 18 | 2.63        | 0.17        | 6.44                        | 6.59                   | 1.02                              |
| within series | calls  | duration                                       | 13 | 0.10        | 0.01        | 11.74                       | 14.14                  | 1.21                              |
|               |        | <i>seq position</i><br>(1 <sup>st</sup>   mid) |    | 0.11   0.1  | 0.02   0.01 | 5.92   7.86                 | 15.04   13.47          | 2.54   1.71                       |
|               |        | interval                                       | 13 | 0.21        | 0.05        | 26.91                       | 25.96                  | 0.96                              |
|               |        | <i>seq position</i><br>(1 <sup>st</sup>   mid) |    | 0.18   0.24 | 0.03   0.08 | 13.48   27.76               | 16.90   34.56          | 1.25   1.24                       |

|       |                                                |    |             |             |              |               |             |
|-------|------------------------------------------------|----|-------------|-------------|--------------|---------------|-------------|
| notes | ICO                                            | 13 | 0.32        | 0.06        | 17.62        | 20.28         | 1.15        |
|       | <i>seq position</i><br>(1 <sup>st</sup>   mid) |    | 0.29   0.34 | 0.04   0.09 | 9.04   20.59 | 14.69   26.98 | 1.62   1.31 |
|       | N1 duration                                    | 13 | 0.01        | 0.00        | 11.71        | 11.89         | 1.02        |
|       | <i>seq position</i><br>(1 <sup>st</sup>   mid) |    | 0.02   0.01 | 0   0       | 7.28   7.32  | 9.9   13.02   | 1.36   1.78 |
|       | N2 duration                                    | 13 | 0.03        | 0.01        | 16.76        | 18.06         | 1.08        |
|       | <i>seq position</i><br>(1 <sup>st</sup>   mid) |    | 0.04   0.03 | 0.01   0.01 | 5.68   10.43 | 16.39   18.07 | 2.88   1.73 |
|       | interval                                       | 13 | 0.05        | 0.01        | 10.45        | 18.56         | 1.78        |
|       | <i>seq position</i><br>(1 <sup>st</sup>   mid) |    | 0.06   0.05 | 0.01   0.01 | 7.06   4.61  | 20.03   20.08 | 2.84   4.36 |
|       | INO                                            | 13 | 0.07        | 0.01        | 8.55         | 13.85         | 1.62        |
|       | <i>seq position</i><br>(1 <sup>st</sup>   mid) |    | 0.07   0.06 | 0.01   0.01 | 5.36   3.42  | 15.58   15.17 | 2.91   4.43 |
|       | N1 DF (kHz)                                    | 13 | 2.51        | 0.17        | 6.14         | 6.89          | 1.12        |
|       | <i>seq position</i><br>(1 <sup>st</sup>   mid) |    | 2.53   2.53 | 0.15   0.19 | 1.8   5.37   | 5.88   7.53   | 3.26   1.4  |
|       | N2 DF (kHz)                                    | 13 | 2.59        | 0.19        | 6.63         | 7.5           | 1.13        |
|       | <i>seq position</i><br>(1 <sup>st</sup>   mid) |    | 2.61   2.58 | 0.21   0.2  | 3.57   6.51  | 8.15   7.8    | 2.28   1.2  |

**Supp. Table 3** Summary of mean, standard deviation, mean of the coefficient of variation within males ( $CV_w$ ), coefficient of variation between males ( $CV_b$ ), and the  $CV_b/CV_w$  ratio for temporal features across timescales of calling. Mean  $CV_w$  is the average CV of within-male calculated CV.  $CV_b$  is the between-male calculated average.  $CV_b/CV_w$  ratio represents the degree to which there is more between-male variation per temporal feature. Ratio values > 1 indicate greater between-male variation than within-male variation for that temporal feature per timescale.

Variation in Spectral Note Features Across Timescales

|              | feature      | N  | mean  | sd   | mean CV <sub>w</sub> | CV <sub>b</sub> (%) | CV <sub>b</sub> /CV <sub>w</sub> Ratio |
|--------------|--------------|----|-------|------|----------------------|---------------------|----------------------------------------|
| within bouts | N1 dfrange   | 18 | 0.00  | 0.00 | 675.15               | 145.93              | 0.22                                   |
|              | N2 dfrange   | 18 | 0.23  | 0.23 | 214.09               | 99.63               | 0.47                                   |
|              | N1 entropy   | 18 | 0.37  | 0.06 | 20.26                | 15.19               | 0.75                                   |
|              | N2 entropy   | 18 | 0.33  | 0.05 | 10.60                | 15.16               | 1.43                                   |
|              | N1 maxdom    | 18 | 2.56  | 0.14 | 4.05                 | 5.63                | 1.39                                   |
|              | N2 maxdom    | 18 | 2.70  | 0.15 | 2.75                 | 5.67                | 2.06                                   |
|              | N1 meandom   | 18 | 2.56  | 0.15 | 4.03                 | 5.68                | 1.41                                   |
|              | N2 meandom   | 18 | 2.63  | 0.17 | 6.44                 | 6.59                | 1.02                                   |
|              | N1 meanpeakf | 18 | 2.58  | 0.15 | 4.23                 | 5.79                | 1.37                                   |
|              | N2 meanpeakf | 18 | 2.68  | 0.15 | 2.58                 | 5.55                | 2.15                                   |
|              | N1 modindx   | 18 | 1.00  | 0.00 | 0.00                 | 0.00                |                                        |
|              | N2 modindx   | 18 | 1.12  | 0.14 | 24.78                | 12.36               | 0.50                                   |
|              | N1 sfm       | 18 | 0.10  | 0.04 | 36.50                | 39.31               | 1.08                                   |
|              | N2 sfm       | 18 | 0.05  | 0.03 | 43.86                | 74.68               | 1.70                                   |
|              | N1 skew      | 18 | 6.64  | 0.70 | 12.02                | 10.61               | 0.88                                   |
|              | N2 skew      | 18 | 11.25 | 1.32 | 10.13                | 11.76               | 1.16                                   |
|              | N1 time.IQR  | 18 | 0.00  | 0.00 | 227.66               | 140.56              | 0.62                                   |
|              | N2 time.IQR  | 18 | 0.02  | 0.01 | 23.20                | 21.47               | 0.93                                   |

|                                                |                                                |             |             |             |              |               |             |
|------------------------------------------------|------------------------------------------------|-------------|-------------|-------------|--------------|---------------|-------------|
| within series                                  | N1 time.median                                 | 18          | 0.00        | 0.00        | 34.25        | 15.51         | 0.45        |
|                                                | N2 time.median                                 | 18          | 0.01        | 0.00        | 55.23        | 37.08         | 0.67        |
|                                                | N1 dfrange                                     | 13          | 0.00        | 0.00        | 403.52       | 165.17        | 0.41        |
|                                                | <i>seq position</i><br>(1 <sup>st</sup>   mid) |             | 0   0       | 0.01   0    | 291.9   245  | 196.2   360.6 | 0.67   1.47 |
|                                                | N2 dfrange                                     | 13          | 0.21        | 0.23        | 204.33       | 113.51        | 0.56        |
|                                                | <i>seq position</i><br>(1 <sup>st</sup>   mid) |             | 0.19   0.23 | 0.37   0.38 | 92.5   149.7 | 194   165.2   | 2.1   1.1   |
|                                                | N1 entropy                                     | 13          | 0.41        | 0.09        | 18.76        | 21.52         | 1.15        |
|                                                | <i>seq position</i><br>(1 <sup>st</sup>   mid) |             | 0.35   0.44 | 0.1   0.1   | 12.2   9.2   | 20.8   22.5   | 1.7   2.5   |
|                                                | N2 entropy                                     | 13          | 0.33        | 0.04        | 13.11        | 13.31         | 1.01        |
|                                                | <i>seq position</i><br>(1 <sup>st</sup>   mid) |             | 0.3   0.3   | 0   0.1     | 5.4   10.6   | 10.8   16.5   | 2   1.6     |
| N1 maxdom                                      | 13                                             | 2.51        | 0.17        | 6.18        | 6.85         | 1.11          |             |
| <i>seq position</i><br>(1 <sup>st</sup>   mid) |                                                | 2.5   2.5   | 0.15   0.19 | 2   5.4     | 5.8   7.5    | 3   1.4       |             |
| N2 maxdom                                      | 13                                             | 2.67        | 0.16        | 1.97        | 6.15         | 3.12          |             |
| <i>seq position</i><br>(1 <sup>st</sup>   mid) |                                                | 2.68   2.66 | 0.16   0.15 | 1.3   1.9   | 6.1   5.7    | 4.8   3       |             |
| N1 meandom                                     | 13                                             | 2.51        | 0.17        | 6.14        | 6.89         | 1.12          |             |
| <i>seq position</i><br>(1 <sup>st</sup>   mid) |                                                | 2.53   2.53 | 0.15   0.19 | 1.8   5.4   | 5.9   7.5    | 3.3   1.4     |             |

|                                                |    |             |             |               |             |            |
|------------------------------------------------|----|-------------|-------------|---------------|-------------|------------|
| N2 meandom                                     | 13 | 2.59        | 0.19        | 6.63          | 7.50        | 1.13       |
| <i>seq position</i><br>(1 <sup>st</sup>   mid) |    | 2.61   2.58 | 0.21   0.2  | 3.6   6.5     | 8.2   7.8   | 2.3   1.2  |
| N1 meanpeakf                                   | 13 | 2.53        | 0.19        | 6.52          | 7.61        | 1.17       |
| <i>seq position</i><br>(1 <sup>st</sup>   mid) |    | 2.54   2.56 | 0.15   0.17 | 1.63   6.32   | 6.1   6.5   | 3.7   1.02 |
| N2 meanpeakf                                   | 13 | 2.65        | 0.16        | 1.84          | 6.21        | 3.38       |
| <i>seq position</i><br>(1 <sup>st</sup>   mid) |    | 2.65   2.65 | 0.16   0.15 | 1.2   1.5     | 6.1   5.7   | 5.1   3.8  |
| N1 modindx                                     | 13 | 1.00        | 0.00        | 0.00          | 0.00        |            |
| <i>seq position</i><br>(1 <sup>st</sup>   mid) |    | 1   1       | 0   0       | 0   0         | 0   0       |            |
| N2 modindx                                     | 13 | 1.13        | 0.17        | 15.75         | 14.81       | 0.94       |
| <i>seq position</i><br>(1 <sup>st</sup>   mid) |    | 1.26   1.08 | 0.35   0.14 | 14.12   10.44 | 27.8   13.2 | 2   1.3    |
| N1 sfm                                         | 13 | 0.11        | 0.05        | 28.01         | 42.39       | 1.51       |
| <i>seq position</i><br>(1 <sup>st</sup>   mid) |    | 0.09   0.13 | 0.05   0.06 | 6.4   18.9    | 52.3   44.8 | 3.2   2.4  |
| N2 sfm                                         | 13 | 0.05        | 0.03        | 38.42         | 65.20       | 1.70       |
| <i>seq position</i><br>(1 <sup>st</sup>   mid) |    | 0.03   0.06 | 0.01   0.05 | 20   25       | 45   78     | 2.3   3.1  |
| N1 skew                                        | 13 | 6.21        | 1.18        | 14.82         | 19.00       | 1.28       |
| <i>seq position</i>                            |    | 6.94   5.84 | 0.55   1.48 | 5.22   9.8    | 7.97   25.4 | 1.5   2.6  |

|                                                |    |                  |             |              |              |           |
|------------------------------------------------|----|------------------|-------------|--------------|--------------|-----------|
| N2 skew                                        | 13 | 10.75            | 1.27        | 13.25        | 11.84        | 0.89      |
| <i>seq position</i><br>(1 <sup>st</sup>   mid) |    | 11.69  <br>10.32 | 0.94   1.66 | 4   13.2     | 8.1   16.1   | 2   1.2   |
| N1 time.IQR                                    | 13 | 0.00             | 0.00        | 143.98       | 113.78       | 0.79      |
| <i>seq position</i><br>(1 <sup>st</sup>   mid) |    | 0   0            | 0   0       | 84.4   42    | 156.7   94.5 | 1.9   2.3 |
| N2 time.IQR                                    | 13 | 0.02             | 0.01        | 28.85        | 24.23        | 0.84      |
| <i>seq position</i><br>(1 <sup>st</sup>   mid) |    | 0.02   0.02      | 0.01   0.01 | 13.2   33.7  | 21.1   27.1  | 1.6   0.8 |
| N1 time.median                                 | 13 | 0.00             | 0.00        | 32.45        | 13.68        | 0.42      |
| <i>seq position</i><br>(1 <sup>st</sup>   mid) |    | 0   0            | 0   0       | 33.1   11.1  | 25.9   11.2  | 0.8   1   |
| N2 time.median                                 | 13 | 0.01             | 0.00        | 68.12        | 45.22        | 0.66      |
| <i>seq position</i><br>(1 <sup>st</sup>   mid) |    | 0.01   0.01      | 0   0       | 41.5   120.3 | 35   59.5    | 0.8   0.5 |

**Supp. Table 4** Summary of mean, standard deviation, mean of the coefficient of variation within males ( $CV_w$ ), coefficient of variation between males ( $CV_b$ ), and the  $CV_b / CV_w$  ratio for spectral features of notes 1 and 2 across timescales. Mean  $CV_w$  is the average within-male CV.  $CV_b$  is the between-male calculated average.  $CV_b / CV_w$  ratio represents the degree to which there is more between-male variation than within such that ratio values  $> 1$  indicate more between-male variation.

| <b>Note Feature</b> | <b>Note 1</b>    |                          | <b>Note 2</b>    |                          | <b>Note 3</b>    |                          |
|---------------------|------------------|--------------------------|------------------|--------------------------|------------------|--------------------------|
|                     | <i>mean ± sd</i> | <i>range (min - max)</i> | <i>mean ± sd</i> | <i>range (min - max)</i> | <i>mean ± sd</i> | <i>range (min - max)</i> |
| duration (s)        | 0.015 ± 0.002    | (0.007 - 0.036)          | 0.037 ± 0.008    | (0.009 - 0.062)          | 0.099 ± 0.015    | (0.043 - 0.130)          |
| INI (s)             | 0.056 ± 0.012    | (0.033 - 0.085)          | 1.119 ± 0.939    | (0.121 - 9.364)          | 1.162 ± 1.252    | (0.234 - 6.741)          |
| INO (s)             | 0.071 ± 0.012    | (0.043 - 0.104)          | 1.156 ± 0.940    | (0.159 - 9.418)          | 1.261 ± 1.253    | (0.330 - 6.849)          |
| meanfreq (kHz)      | 2.768 ± 0.216    | (2.258 - 3.828)          | 2.856 ± 0.217    | (2.457 - 4.027)          | 2.810 ± 0.266    | (2.310 - 3.444)          |
| freq.IQR (kHz)      | 0.227 ± 0.301    | (0.048 - 1.857)          | 0.105 ± 0.217    | (0.018 - 2.919)          | 0.665 ± 0.745    | (0.052 - 2.030)          |
| time.median (s)     | 0.003 ± 0.001    | (0.000 - 0.014)          | 0.008 ± 0.005    | (0.000 - 0.024)          | 0.047 ± 0.013    | (0.017 - 0.080)          |
| time.IQR (s)        | 0.002 ± 0.005    | (0.000 - 0.023)          | 0.022 ± 0.007    | (0.000 - 0.041)          | 0.045 ± 0.010    | (0.026 - 0.067)          |
| skew                | 6.691 ± 1.145    | (2.224 - 9.057)          | 11.084 ± 1.741   | (2.721 - 14.494)         | 6.576 ± 1.499    | (3.044 - 11.003)         |
| entropy             | 0.364 ± 0.104    | (0.152 - 0.642)          | 0.324 ± 0.062    | (0.200 - 0.661)          | 0.619 ± 0.095    | (0.453 - 0.780)          |
| Sfm                 | 0.098 ± 0.053    | (0.023 - 0.288)          | 0.046 ± 0.042    | (0.013 - 0.291)          | 0.074 ± 0.052    | (0.012 - 0.242)          |
| meandom (kHz)       | 2.530 ± 0.201    | (1.421 - 3.144)          | 2.603 ± 0.279    | (0.876 - 4.235)          | 2.250 ± 0.347    | (1.554 - 2.848)          |
| maxdom (kHz)        | 2.532 ± 0.201    | (1.421 - 3.144)          | 2.694 ± 0.400    | (1.507 - 7.967)          | 2.645 ± 0.333    | (1.938 - 3.747)          |
| dfrange             | 0.004 ± 0.036    | (0.000 - 1.464)          | 0.245 ± 0.755    | (0.000 - 7.838)          | 0.880 ± 0.875    | (0.086 - 3.531)          |
| modindx             | 1.000 ± 0.000    | (1.000 - 1.000)          | 1.130 ± 0.348    | (1.000 - 5.000)          | 1.395 ± 0.587    | (1.000 - 4.000)          |
| enddom (kHz)        | 2.532 ± 0.201    | (1.421 - 3.144)          | 2.509 ± 0.703    | (0.043 - 7.967)          | 2.332 ± 0.747    | (0.043 - 2.972)          |
| meanpeakf (kHz)     | 2.543 ± 0.213    | (1.427 - 3.142)          | 2.650 ± 0.184    | (1.513 - 3.367)          | 2.348 ± 0.411    | (1.513 - 2.897)          |

**Supp. Table 5** Summary of temporal and spectral note features between males by note type.

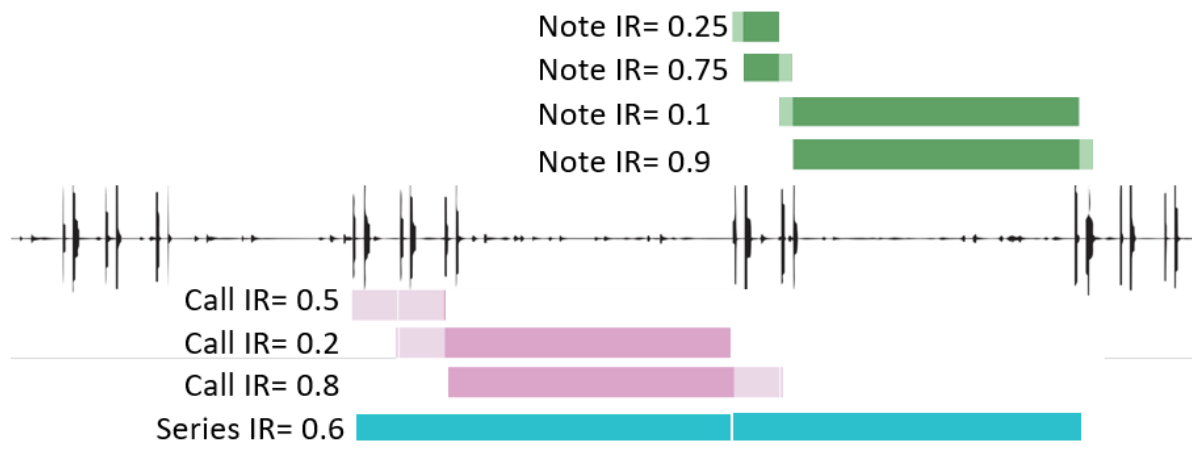

**Supp. Fig. 2** Potential non-0.5 call and note IR within and between series.
